# Supplementary material for: Integrated bioinformatics analysis of the transcription factor-mediated gene regulatory networks in the formation of spermatogonial stem cells
Source: Front Physiol. 2022 Dec 8;13:949486. doi: 10.3389/fphys.2022.949486 (PMC9773208; doi:10.3389/fphys.2022.949486)
Supplement: Supplementary file 1 [file Table2.XLSX]

## Sheet: Sheet1
Supplementary Table 3: Cell-specific TFs and their targeting cell-specific genes in mouse ESCs, PGCs, and SSCs
ESCs		E10.5 PGCs		E13.5 mPGCs		E14.5 mPGCs		SSCs
TFs	Targeted genes	TFs	Targeted genes	TFs	Targeted genes	TFs	Targeted genes	TFs	Targeted genes
junB	Cd300ld3	CRX	Med19	Cdx2	Cops3	bHLHE41	Ptcra	Ascl1	Ccdc173
BATF	Gstp3			Cdx2	Ccpg1	bHLHE41	Avp	Ascl1	Mfsd8
BATF	Dpep2			Cdx2	Cep89	bHLHE41	Izumo4	Ascl1	Olfr9
BATF	Fxyd4			Cdx2	Sult6b2	DMRT1	Ttc22	Ascl1	Polr2h
BATF	Ang			Cdx2	Pdzk1	DMRT1	Defb21	Ascl1	Acss2
BATF	Spata31d1b			Hoxd11	Tapbpl	DMRT1	Cplx4	Ascl1	Ergic3
BATF	Tnfrsf4			Hoxd11	Sgcg	DMRT1	4933428G20Rik	Ascl1	1110065P20Rik
Atf3	I830077J02Rik			Hoxd11	Ccpg1	DMRT1	4930564D02Rik	Ascl1	Cav3
Atf3	Gmfg			Hoxd11	Cep89	DMRT1	Mei1	Ascl1	Mfap1a
Atf3	Arhgap17			Hoxd11	Sult6b2	DMRT1	Slc24a5	Ascl1	Htr2b
Atf3	Ccnt2			Hoxd11	Pdzk1	DMRT1	Gm13547	Ascl1	Emp3
Atf3	Dpep2			Hoxd11	Krt19	DMRT1	Olfr463	Ascl1	Tcte2
Atf3	Cd300ld3					DMRT1	Pla2g2d	Ascl1	Rab30
Atf3	Laptm5					DMRT1	Muc3	Ascl1	Tnfrsf13c
Atf3	Cd244a					DMRT1	Acaa2	Ascl1	Cox4i2
Nr5a2	St6galnac1					DMRT1	Tdrd1	Ascl1	Mterf4
Fos	Gstp3					DMRT1	Rnf31	Ascl1	Akna
Fos	Vps50					DMRT1	Gdpd3	Ascl1	Krtap9-3
Fos	Dusp27					Hoxc9	Krt84	Ascl1	Rpa3
Fos	AU021092					Hoxc9	Ccdc188	Ascl1	Ssc5d
Fos	Nudcd2					Hoxc9	F830045P16Rik	Ascl1	Tnnt2
Fos	Krtap4-7					Hoxc9	Gm15501	Ascl1	Eno3
Fos	Tnfsf4					Hoxc9	Slc32a1	Ascl1	Angpt4
Fos	Casp14					Hoxc9	Treml4	Ascl1	Eef1akmt1
Fos	R3hdm1					Hoxc9	Myh13	Ascl1	Odf3
Fos	Sertad4					Hoxc9	Gpr61	Ascl1	Lingo4
Fos	Hspb2					Hoxc9	Foxn4	Ascl1	Clic1
Fos	Drap1					Hoxc9	Gm6588	Ascl1	Brox
Fos	Mmgt2					Hoxc9	Ppp1r17	Ascl1	Cdc42se1
Fos	Gmfg					Hoxc9	Mab21l2	Ascl1	Hook1
Fos	Arhgap17					Hoxc9	Cypt1	Ascl1	Ecscr
Fos	Ccnt2					Hoxc9	Hoxa9	Ascl1	Hsp90b1
Fos	Dpep2					Hoxc9	Pla2g2d	Ascl1	Mymk
Fos	Fank1					Hoxc9	Agr2	Ascl1	Desi1
Fos	Ang					Hoxc9	Olfr958	Ascl1	Wdr95
Fos	Laptm5					Hoxc9	2310061N02Rik	Ascl1	Ranbp10
Fos	Psmb11					n-Myc	Klhdc7b	Ascl1	Zbtb49
Fos	Mettl11b					n-Myc	Naaladl1	Ascl1	Flnc
Tbr1	Cd226					n-Myc	Atcay	Ascl1	Cbarp
Tbr1	Kmt2b					n-Myc	Ptcra	Ascl1	Ankrd34a
Tbr1	Kntc1					n-Myc	Mei1	Ascl1	Gabpb2
Tbr1	Ncstn					n-Myc	Tsc2	Ascl1	Tex35
Tbr1	Dpep2					n-Myc	Rnf31	Ascl1	Rnf25
GLI3	Nudcd2					NPAS3	1700013G24Rik	Ascl1	Map2k3
GLI3	Pard6a					NPAS3	Ttc22	Ascl1	Cd248
GLI3	Kntc1					NPAS3	Atcay	Ascl1	Kremen2
GLI3	Ddn					NPAS3	F830045P16Rik	Ascl1	Kdm6b
GLI3	Foxl2					NPAS3	Myh13	Ascl1	Syde1
GLI3	Drap1					NPAS3	Clec10a	Ascl1	Best3
GLI3	Ncstn					NPAS3	Gpr61	Ascl1	Mylk4
GLI3	Mmgt2					NPAS3	Ptcra	Ascl1	Gm525
GLI3	Arhgap17					NPAS3	Cct8l1	Ascl1	Wnt10a
GLI3	Ccnt2					NPAS3	Foxn4	Ascl1	Gorasp1
GLI3	Fank1					NPAS3	4930564D02Rik	Ascl1	Wnt1
GLI3	Ang					NPAS3	Tsc2	Ascl1	Usp5
GLI3	Psmb11					NPAS3	Zfp27	Ascl2	Trip11
GLI3	Sez6l2					NPAS3	Rspry1	Ascl2	Grifin
Tcf3	Kmt2b					NPAS3	Tdrd1	Ascl2	Rgs1
Tcf3	Laptm5					NPAS3	Rnf31	Ascl2	Donson
Tcf3	Arhgap17					NPAS3	Gdpd3	Ascl2	Cytip
Tcf3	Pard6a					NPAS3	Plcd3	Ascl2	Ccn6
Nkx6	Vps50					NPAS3	Gfy	Ascl2	Bfsp2
Nkx6	Kntc1					NPAS3	Naaladl1	Ascl2	Oser1
Nkx6	Gm13420					NPAS3	Izumo4	Ascl2	Mfap1a
Nkx6	Gmfg							Ascl2	Gpr132
Nkx6	Ccnt2							Ascl2	Emp3
Nkx6	Dpep2							Ascl2	Tnfsf14
Nkx6	Ang							Ascl2	Qprt
Isl1	Dusp27							Ascl2	Mastl
Isl1	Nudcd2							Ascl2	Dph5
Isl1	Calm5							Ascl2	Mterf4
Isl1	Pcdhb7							Ascl2	Cnfn
Isl1	Crx							Ascl2	Skap1
Isl1	Cd300ld3							Ascl2	Asb2
Isl1	Kntc1							Ascl2	Aldh3b1
Isl1	R3hdm1							Ascl2	Dntt
Isl1	Drap1							Ascl2	Gpr183
Isl1	Ccnt2							Ascl2	Tnnt2
Isl1	Fank1							Ascl2	Eno3
Isl1	Ang							Ascl2	Fam71b
Isl1	Lpar5							Ascl2	Cnga1
Isl1	Igll1							Ascl2	Hsd11b1
Isl1	Pcdhb20							Ascl2	Lcp2
Isl1	Csn1s2b							Ascl2	S100a4
Isl1	Zfp990							Ascl2	H2bc21
Isl1	Psmb11							Ascl2	Il2rb
Isl1	Olfr38							Ascl2	Ep400
RUNX1	I830077J02Rik							Ascl2	Rbp7
RUNX1	Pard6a							Ascl2	Sla
RUNX1	Ncstn							Ascl2	Tmem151b
RUNX1	Gmfg							Ascl2	Hook1
RUNX1	Arhgap17							Ascl2	Irgm2
RUNX1	Fank1							Ascl2	Lrtm2
RUNX1	Tstd1							Ascl2	Mymk
RUNX1	Laptm5							Ascl2	Arhgef6
RUNX2	Vps50							Ascl2	Tnf
RUNX2	Nudcd2							Ascl2	Grin2c
RUNX2	Kmt2b							Ascl2	Ranbp10
RUNX2	Kntc1							Ascl2	Tespa1
RUNX2	Ncstn							Ascl2	Htra2
RUNX2	Arhgap17							Ascl2	Il21r
RUNX2	Dpep2							Ascl2	Cbarp
RUNX2	Ang							Ascl2	Dbh
RUNX2	Gstp3							Ascl2	Parvg
RUNX2	Ces1a							Ascl2	Slfn8
RUNX2	R3hdm1							Ascl2	Exoc3l
RUNX2	Sertad4							Ascl2	Armc6
RUNX2	Gmfg							Ascl2	Cd27
RUNX2	Ccnt2							Ascl2	Ap3m1
RUNX2	Veph1							Ascl2	Wnt10a
								Ascl2	Milr1
								Ascl2	Ube2d3
								Ascl2	Osgin1
								Ascl2	Nat9
								Ascl2	Qrfp
								Atf4	Gm11437
								Atf4	Trim56
								Atf4	Ccl7
								Atf4	Spaca9
								Atf4	C1qtnf7
								Atf4	Acox2
								Atf4	Dthd1
								Atf4	Serpina3g
								Atf4	Serpina3n
								Atf4	Myd88
								Atf4	Znhit1
								Atf4	Mfap1a
								Atf4	Spink4
								Atf4	Avil
								Atf4	Mrpl13
								Atf4	Rtl3
								Atf4	Il13ra2
								Atf4	Olfr432
								Atf4	Capn8
								Atf4	Akna
								Atf4	Gbp6
								Atf4	Ifi211
								Atf4	Actl11
								Atf4	Ccl2
								Atf4	Blzf1
								Atf4	Rpa3
								Atf4	E030018B13Rik
								Atf4	Errfi1
								Atf4	Krt80
								Atf4	Ankrd23
								Atf4	Mrpl54
								Atf4	Itga11
								Atf4	Ifi204
								Atf4	Has2
								Atf4	Sh3bp5l
								Atf4	Sla
								Atf4	Brox
								Atf4	Olfr433
								Atf4	Ncdn
								Atf4	Sec61b
								Atf4	Rnf144a
								Atf4	Wdpcp
								Atf4	Trmt112
								Atf4	P2ry14
								Atf4	Hyls1
								Atf4	Prg4
								Atf4	Igfbp1
								Atf4	Il21r
								Atf4	Flnc
								Atf4	Serpina16
								Atf4	Pip4p1
								Atf4	Pax8
								Atf4	Naa50
								Atf4	Wdfy2
								Atf4	Dbh
								Atf4	Cks1b
								Atf4	Recql4
								Atf4	Cdsn
								Atf4	Ogn
								Atf4	Fam234b
								Atf4	Setd5
								Atf4	Kdm6b
								Atf4	Trhr
								Atf4	Syde1
								Atf4	Casp4
								Atf4	Exosc8
								Atf4	Ankrd1
								Atf4	Ccdc80
								Atf4	Cd86
								Atf4	Wars
								Atoh1	Lrtm2
								Atoh1	Gcgr
								Atoh1	Wdr95
								Atoh1	Wfikkn2
								Atoh1	Cav3
								Atoh1	Akna
								Atoh1	Sema3g
								Atoh1	Ankrd23
								Atoh1	Sstr3
								Atoh1	Colec11
								Atoh1	Casq2
								Atoh1	Clic1
								Atoh1	Bag5
								Atoh1	Nhlh1
								BHLHA15	Dio1
								BHLHA15	Trmt5
								BHLHA15	Atp13a4
								BHLHA15	Nkpd1
								BHLHA15	Adal
								BHLHA15	Ermap
								BHLHA15	Moap1
								BHLHA15	Cxcl13
								BHLHA15	Nedd8
								BHLHA15	Zfp277
								BHLHA15	Eef1d
								BHLHA15	Iqcn
								BHLHA15	Xrcc3
								BHLHA15	Fcgr4
								BHLHA15	Bglap2
								BHLHA15	1110065P20Rik
								BHLHA15	Akr1b8
								BHLHA15	Tmem212
								BHLHA15	Oser1
								BHLHA15	Ccdc190
								BHLHA15	A530016L24Rik
								BHLHA15	Dll4
								BHLHA15	Adcy4
								BHLHA15	Emp3
								BHLHA15	1810024B03Rik
								BHLHA15	Tspan31
								BHLHA15	Sdsl
								BHLHA15	Klhdc3
								BHLHA15	Rnase13
								BHLHA15	Cog8
								BHLHA15	Dph5
								BHLHA15	Sdr9c7
								BHLHA15	1810046K07Rik
								BHLHA15	Capn8
								BHLHA15	Alg10b
								BHLHA15	Hic2
								BHLHA15	Gm12500
								BHLHA15	Mterf4
								BHLHA15	Pdcd10
								BHLHA15	Zfp882
								BHLHA15	Sys1
								BHLHA15	Tex33
								BHLHA15	Hax1
								BHLHA15	Slc24a1
								BHLHA15	Rpa3
								BHLHA15	Zfp319
								BHLHA15	Fam71b
								BHLHA15	Ms4a1
								BHLHA15	Plin4
								BHLHA15	Krt80
								BHLHA15	Zc2hc1c
								BHLHA15	Cnbd2
								BHLHA15	Glt8d1
								BHLHA15	Colec11
								BHLHA15	Spns3
								BHLHA15	Ccdc115
								BHLHA15	Odf3
								BHLHA15	Gm7616
								BHLHA15	Gin1
								BHLHA15	Ly6g5c
								BHLHA15	Chkb
								BHLHA15	Abcg8
								BHLHA15	H2bc21
								BHLHA15	Clic1
								BHLHA15	Gjc2
								BHLHA15	Jph2
								BHLHA15	Lyve1
								BHLHA15	Atrip
								BHLHA15	Gper1
								BHLHA15	Defb13
								BHLHA15	Mcam
								BHLHA15	Nr0b2
								BHLHA15	Gsta3
								BHLHA15	Gpr179
								BHLHA15	Rbp7
								BHLHA15	Nudcd1
								BHLHA15	Mip
								BHLHA15	Cdc42se1
								BHLHA15	Pdzk1ip1
								BHLHA15	Ptcd3
								BHLHA15	2410124H12Rik
								BHLHA15	Prph2
								BHLHA15	Wdr95
								BHLHA15	Il22ra1
								BHLHA15	Adh1
								BHLHA15	Churc1
								BHLHA15	Mettl1
								BHLHA15	Entpd8
								BHLHA15	Ptges
								BHLHA15	Pcolce
								BHLHA15	Wdr12
								BHLHA15	Gabarapl1
								BHLHA15	Erg28
								BHLHA15	Hnf4a
								BHLHA15	Ttc16
								BHLHA15	Serpina16
								BHLHA15	Cbarp
								BHLHA15	Slc11a1
								BHLHA15	Srr
								BHLHA15	Wdfy2
								BHLHA15	Pradc1
								BHLHA15	Gabpb2
								BHLHA15	Ppil6
								BHLHA15	Parvg
								BHLHA15	Cmtm2b
								BHLHA15	Cd248
								BHLHA15	Cyb561d2
								BHLHA15	Agap2
								BHLHA15	Cpa4
								BHLHA15	Exosc8
								BHLHA15	Vwa7
								BHLHA15	Ptpn7
								BHLHA15	Exoc3l
								BHLHA15	Ndor1
								BHLHA15	Armc6
								BHLHA15	Cyp4f14
								BHLHA15	Ap3m1
								BHLHA15	Siae
								BHLHA15	Gorasp1
								BHLHA15	Wnt1
								BHLHA15	Osgin1
								BHLHA15	Nat9
								BHLHA15	Bhlha15
								BHLHA15	Tatdn1
								BHLHA15	Tex29
								BHLHA15	Trim56
								BHLHA15	Trip11
								BHLHA15	Zfyve19
								BHLHA15	Flrt1
								BHLHA15	Polr2h
								BHLHA15	Uba5
								BHLHA15	Cytip
								BHLHA15	Mrpl14
								BHLHA15	Gpd1
								BHLHA15	Ripk2
								BHLHA15	Mfap1a
								BHLHA15	Wfdc1
								BHLHA15	C1qtnf5
								BHLHA15	Tcte2
								BHLHA15	Tmem258
								BHLHA15	Mterf1b
								BHLHA15	Galnt15
								BHLHA15	Rab30
								BHLHA15	Fastkd5
								BHLHA15	Cox4i2
								BHLHA15	Defb28
								BHLHA15	Emilin1
								BHLHA15	Oxnad1
								BHLHA15	Krtap9-3
								BHLHA15	Gbgt1
								BHLHA15	Cldn15
								BHLHA15	Cnfn
								BHLHA15	Ncmap
								BHLHA15	Slc35f6
								BHLHA15	Gtf3c4
								BHLHA15	Aldh1a7
								BHLHA15	Sema3g
								BHLHA15	Skap1
								BHLHA15	Arfrp1
								BHLHA15	E030018B13Rik
								BHLHA15	Rxfp4
								BHLHA15	Tnnt2
								BHLHA15	Eno3
								BHLHA15	Errfi1
								BHLHA15	Pnliprp1
								BHLHA15	Glb1l
								BHLHA15	Ccdc107
								BHLHA15	Ankrd23
								BHLHA15	Sstr3
								BHLHA15	Ms4a5
								BHLHA15	1110032A03Rik
								BHLHA15	Rsph14
								BHLHA15	1600014C23Rik
								BHLHA15	Eef1akmt1
								BHLHA15	Rhbdl1
								BHLHA15	Sult1c2
								BHLHA15	Tsacc
								BHLHA15	Alox15
								BHLHA15	Gucd1
								BHLHA15	Mterf1a
								BHLHA15	Inpp5j
								BHLHA15	Epb42
								BHLHA15	Mfap4
								BHLHA15	Itih2
								BHLHA15	Wdr54
								BHLHA15	Dynll1
								BHLHA15	Hook1
								BHLHA15	Ecscr
								BHLHA15	Xab2
								BHLHA15	Lrtm2
								BHLHA15	Rnf139
								BHLHA15	Ncdn
								BHLHA15	Ffar2
								BHLHA15	Fbxo24
								BHLHA15	Sec61b
								BHLHA15	C1qc
								BHLHA15	Trmt112
								BHLHA15	Mpst
								BHLHA15	Iqch
								BHLHA15	Ranbp10
								BHLHA15	Rbak
								BHLHA15	Sec16a
								BHLHA15	Lrrc39
								BHLHA15	Bcl2l12
								BHLHA15	Gtf2e1
								BHLHA15	Ccrl2
								BHLHA15	Zbtb49
								BHLHA15	Pbld2
								BHLHA15	Sdhc
								BHLHA15	Dcst2
								BHLHA15	Stab1
								BHLHA15	Ankrd34a
								BHLHA15	Syngap1
								BHLHA15	Lbp
								BHLHA15	Tex35
								BHLHA15	Igfn1
								BHLHA15	1700029J07Rik
								BHLHA15	Emc3
								BHLHA15	Rbks
								BHLHA15	Lgals9
								BHLHA15	Fmod
								BHLHA15	Pdxdc1
								BHLHA15	Zfp408
								BHLHA15	Wdr86
								BHLHA15	Rag1
								BHLHA15	Aqp1
								BHLHA15	Setd5
								BHLHA15	Baiap2l1
								BHLHA15	Kdm6b
								BHLHA15	Trex1
								BHLHA15	Syde1
								BHLHA15	Mybpc2
								BHLHA15	Fkbp10
								BHLHA15	U2af1l4
								BHLHA15	Polr3a
								BHLHA15	Insrr
								BHLHA15	Mau2
								BHLHA15	Troap
								BHLHA15	Mylk4
								BHLHA15	Cpb1
								BHLHA15	Enoph1
								BHLHA15	Tnfsf13
								BHLHA15	Ikzf5
								BHLHA15	Ube2d3
								BHLHA15	Sptbn5
								BHLHA15	Mkln1
								BHLHA15	Bag5
								BHLHA15	Fam227b
								BHLHA15	Irs3
								EBF1	2810004N23Rik
								EBF1	Glyr1
								EBF1	Cct6a
								EBF1	Xrcc3
								EBF1	Fkbp15
								EBF1	1110065P20Rik
								EBF1	Avil
								EBF1	Emp3
								EBF1	Qprt
								EBF1	Dph5
								EBF1	Col28a1
								EBF1	Phf7
								EBF1	Gm14137
								EBF1	Sys1
								EBF1	Fam71b
								EBF1	Ms4a1
								EBF1	Krt80
								EBF1	Calml4
								EBF1	Cdk9
								EBF1	C5ar1
								EBF1	Glt8d1
								EBF1	Eaf1
								EBF1	Etv3l
								EBF1	Gjc2
								EBF1	Il2rb
								EBF1	Bex6
								EBF1	Rbp7
								EBF1	Sla
								EBF1	Ckap2l
								EBF1	Brox
								EBF1	Hsp90b1
								EBF1	Gcgr
								EBF1	Mettl1
								EBF1	Tnf
								EBF1	Ptges
								EBF1	Osm
								EBF1	Pcolce
								EBF1	Il21r
								EBF1	Mutyh
								EBF1	Slc11a1
								EBF1	St13
								EBF1	Haus8
								EBF1	Cdh17
								EBF1	Recql4
								EBF1	Parvg
								EBF1	Cyb561d2
								EBF1	Hcls1
								EBF1	Ptpn7
								EBF1	Sap30bp
								EBF1	Cd27
								EBF1	Ap3m1
								EBF1	Cbln3
								EBF1	Aox2
								EBF1	Gorasp1
								EBF1	Osgin1
								EBF1	Efcab9
								EBF1	BC028528
								EBF1	Bhlha15
								EBF1	Prpf38a
								EBF1	Zfyve19
								EBF1	Slc25a29
								EBF1	Lct
								EBF1	Mrpl14
								EBF1	Myd88
								EBF1	Bfsp2
								EBF1	Znhit1
								EBF1	Mterf1b
								EBF1	Tnfrsf13c
								EBF1	Emilin1
								EBF1	Slc9a1
								EBF1	Hacl1
								EBF1	Akna
								EBF1	Slc35f6
								EBF1	Sectm1b
								EBF1	Sema3g
								EBF1	Cmc1
								EBF1	Asb2
								EBF1	E030018B13Rik
								EBF1	Aldh3b1
								EBF1	Ssc5d
								EBF1	Dntt
								EBF1	Odaph
								EBF1	Csf1r
								EBF1	Ccdc107
								EBF1	1110032A03Rik
								EBF1	Rsph14
								EBF1	1600014C23Rik
								EBF1	Svopl
								EBF1	Ly6a
								EBF1	Clcn6
								EBF1	Gimap6
								EBF1	Tmem129
								EBF1	Zbtb26
								EBF1	Ncdn
								EBF1	Scnm1
								EBF1	Zwilch
								EBF1	Mpst
								EBF1	Grin2c
								EBF1	Dad1
								EBF1	Emg1
								EBF1	Bcl2l12
								EBF1	Krba1
								EBF1	Acsbg1
								EBF1	Htra2
								EBF1	Pbld2
								EBF1	Pip4p1
								EBF1	Nmrk2
								EBF1	Syngap1
								EBF1	Ints13
								EBF1	Map2k3
								EBF1	Fam234b
								EBF1	Zfp408
								EBF1	Yju2
								EBF1	Kdm6b
								EBF1	Smc4
								EBF1	Syde1
								EBF1	Mybpc2
								EBF1	Wnt10a
								EBF1	Ranbp1
								EBF1	Ube2d3
								EBF2	Polr3c
								EBF2	Psma4
								EBF2	Grifin
								EBF2	Spaca9
								EBF2	Sox21
								EBF2	Nat3
								EBF2	Eef1d
								EBF2	Ccn6
								EBF2	Bglap2
								EBF2	Plagl2
								EBF2	1110065P20Rik
								EBF2	Serpina3n
								EBF2	Map3k19
								EBF2	Mrps26
								EBF2	Mybphl
								EBF2	Oser1
								EBF2	Cdca2
								EBF2	Hspb7
								EBF2	Ctdspl2
								EBF2	Akr1cl
								EBF2	Itih3
								EBF2	Tspan31
								EBF2	Fam104a
								EBF2	Cog8
								EBF2	Pus7l
								EBF2	Phf7
								EBF2	Capn8
								EBF2	Lrrc4b
								EBF2	Mterf4
								EBF2	4930558K02Rik
								EBF2	Gm14137
								EBF2	Nr1i2
								EBF2	Plin4
								EBF2	Calml4
								EBF2	Gm4925
								EBF2	Glt8d1
								EBF2	Odf3
								EBF2	Eaf1
								EBF2	Abcg8
								EBF2	Etv3l
								EBF2	Lingo4
								EBF2	Nkg7
								EBF2	Lyve1
								EBF2	Mcam
								EBF2	Col4a2
								EBF2	Pdzk1ip1
								EBF2	Hsp90b1
								EBF2	Lce1h
								EBF2	Mettl1
								EBF2	Ptges
								EBF2	Iqca1l
								EBF2	C7
								EBF2	Erg28
								EBF2	Tex37
								EBF2	Lect2
								EBF2	Cbarp
								EBF2	Otof
								EBF2	Srr
								EBF2	Wdfy2
								EBF2	Ppil6
								EBF2	Recql4
								EBF2	Parvg
								EBF2	Zfp142
								EBF2	Cd248
								EBF2	Cyb561d2
								EBF2	Gys2
								EBF2	Agap2
								EBF2	Ndufs3
								EBF2	Kremen2
								EBF2	Kcne1l
								EBF2	Exosc8
								EBF2	Akap6
								EBF2	Vwa7
								EBF2	Ptpn7
								EBF2	Armc6
								EBF2	Ap3m1
								EBF2	Cbln3
								EBF2	Gorasp1
								EBF2	Milr1
								EBF2	Wars
								EBF2	Ppme1
								EBF2	Osgin1
								EBF2	Nat9
								EBF2	Dus4l
								EBF2	Tex29
								EBF2	Cdc27
								EBF2	Trip11
								EBF2	Zfyve19
								EBF2	Slc25a29
								EBF2	Pop1
								EBF2	Polr2h
								EBF2	Aaas
								EBF2	Uba5
								EBF2	Ergic3
								EBF2	Mrpl37
								EBF2	Myd88
								EBF2	Gpc2
								EBF2	Znhit1
								EBF2	Crygs
								EBF2	Gpr132
								EBF2	Nipa2
								EBF2	C1qtnf5
								EBF2	Tcte2
								EBF2	Cops5
								EBF2	Il17c
								EBF2	Tnfrsf13c
								EBF2	Cox4i2
								EBF2	Oxnad1
								EBF2	Akna
								EBF2	Cldn15
								EBF2	Cnfn
								EBF2	Slc35f6
								EBF2	Asb2
								EBF2	Ssc5d
								EBF2	Eno3
								EBF2	Glb1l
								EBF2	Sstr3
								EBF2	Rsph14
								EBF2	Sdcbp2
								EBF2	Olfr148
								EBF2	Hoxa1
								EBF2	Zdhhc3
								EBF2	Eps8l3
								EBF2	Sh3bp5l
								EBF2	Tmem129
								EBF2	Itih2
								EBF2	Wdr54
								EBF2	Tmem151b
								EBF2	Cip2a
								EBF2	Hsdl1
								EBF2	Mfap2
								EBF2	Mymk
								EBF2	Lyzl4
								EBF2	Dcaf17
								EBF2	Ncdn
								EBF2	Gm3646
								EBF2	Scnm1
								EBF2	Mpst
								EBF2	Ifitm5
								EBF2	Iqch
								EBF2	Grin2c
								EBF2	Dad1
								EBF2	Ranbp10
								EBF2	Selenon
								EBF2	Frmpd3
								EBF2	Trmt6
								EBF2	Ftsj3
								EBF2	Krtap28-13
								EBF2	Ptges3l
								EBF2	Map2k3
								EBF2	Lgals9
								EBF2	Fmod
								EBF2	Rag1
								EBF2	Baiap2l1
								EBF2	Insrr
								EBF2	Troap
								EBF2	Casq2
								EBF2	6030498E09Rik
								EBF2	Enoph1
								EBF2	Ranbp1
								EBF2	Ikzf5
								EBF2	Plekhg6
								EBF2	Usp5
								EBF2	Qrfp
								EBF2	Sox7
								EBF2	Fam227b
								EBF2	Frg2f1
								EBF2	6030458C11Rik
								EBF2	Adal
								EBF2	2810004N23Rik
								EBF2	Ermap
								EBF2	Glyr1
								EBF2	Moap1
								EBF2	Ptcd1
								EBF2	Nedd8
								EBF2	Zfp277
								EBF2	Iqcn
								EBF2	Xrcc3
								EBF2	Defb25
								EBF2	Fkbp15
								EBF2	Klrb1c
								EBF2	Dll4
								EBF2	Abca6
								EBF2	Poglut2
								EBF2	Adcy4
								EBF2	Dupd1
								EBF2	Gpalpp1
								EBF2	Mrpl13
								EBF2	Qprt
								EBF2	Col28a1
								EBF2	Popdc3
								EBF2	Asic4
								EBF2	Glul
								EBF2	Sncg
								EBF2	Higd1b
								EBF2	Zfp882
								EBF2	Allc
								EBF2	Cxcr1
								EBF2	Rps27
								EBF2	Slc7a6os
								EBF2	Krt80
								EBF2	Misp
								EBF2	Olfr224
								EBF2	Cdk9
								EBF2	Gkn3
								EBF2	Colec11
								EBF2	Ager
								EBF2	Gm7616
								EBF2	Chkb
								EBF2	Clic1
								EBF2	Nhlh1
								EBF2	Il2rb
								EBF2	Nr0b2
								EBF2	Rbp7
								EBF2	Lrrc57
								EBF2	Ckap2l
								EBF2	Brox
								EBF2	Kcng4
								EBF2	Prph2
								EBF2	Trpv1
								EBF2	Wdpcp
								EBF2	Lmx1b
								EBF2	Churc1
								EBF2	Cd96
								EBF2	Tmem79
								EBF2	Pcolce
								EBF2	Cpa5
								EBF2	Mutyh
								EBF2	Psapl1
								EBF2	Zbtb37
								EBF2	Osgep
								EBF2	Styxl1
								EBF2	Slc11a1
								EBF2	Fhl4
								EBF2	Lim2
								EBF2	Pradc1
								EBF2	St13
								EBF2	Cks1b
								EBF2	Asb15
								EBF2	Tex38
								EBF2	Entr1
								EBF2	Pigp
								EBF2	Sap30bp
								EBF2	Fga
								EBF2	Cd27
								EBF2	Siae
								EBF2	Col7a1
								EBF2	Dnajb9
								EBF2	Tmem43
								EBF2	BC028528
								EBF2	Meox1
								EBF2	Romo1
								EBF2	Agt
								EBF2	Bhlha15
								EBF2	Dis3
								EBF2	Prpf38a
								EBF2	Flrt1
								EBF2	Donson
								EBF2	Kxd1
								EBF2	Acss2
								EBF2	Pkd1l3
								EBF2	Klhl28
								EBF2	Mrpl14
								EBF2	Gpd1
								EBF2	Fam166b
								EBF2	Ripk2
								EBF2	Mfap1a
								EBF2	S1pr5
								EBF2	Gpm6a
								EBF2	Galnt15
								EBF2	Fastkd5
								EBF2	Sgce
								EBF2	Emilin1
								EBF2	Slc9a1
								EBF2	Gtf3c4
								EBF2	Sema3g
								EBF2	Itprid1
								EBF2	Cacng8
								EBF2	Cmc1
								EBF2	Tnnt2
								EBF2	Errfi1
								EBF2	Hsd11b1
								EBF2	Ccdc107
								EBF2	1110032A03Rik
								EBF2	Cd300a
								EBF2	1600014C23Rik
								EBF2	Prnp
								EBF2	Zfp654
								EBF2	Krt87
								EBF2	Pla2g2e
								EBF2	Clcn6
								EBF2	Ranbp3l
								EBF2	Kctd19
								EBF2	2700097O09Rik
								EBF2	Epb42
								EBF2	Arhgef15
								EBF2	Mfap4
								EBF2	Podnl1
								EBF2	Zbtb26
								EBF2	Dynll1
								EBF2	Xab2
								EBF2	Rnf139
								EBF2	L3hypdh
								EBF2	Ffar2
								EBF2	Orc4
								EBF2	Fbxo24
								EBF2	Sec61b
								EBF2	C1qc
								EBF2	Fam217b
								EBF2	Trmt112
								EBF2	Pheta2
								EBF2	Mttp
								EBF2	Hyls1
								EBF2	Sap18
								EBF2	Emg1
								EBF2	Rps21
								EBF2	Sec16a
								EBF2	Aoc3
								EBF2	Krba1
								EBF2	Htra2
								EBF2	Spink13
								EBF2	Psd2
								EBF2	Pbld2
								EBF2	Gal3st4
								EBF2	Pip4p1
								EBF2	Sdhc
								EBF2	Enkur
								EBF2	Dcst2
								EBF2	Nxph4
								EBF2	Nmrk2
								EBF2	Dbh
								EBF2	Rgs11
								EBF2	Lbp
								EBF2	Tex35
								EBF2	Ints13
								EBF2	Pdxdc1
								EBF2	Zfp408
								EBF2	Wdr86
								EBF2	Tbx5
								EBF2	Aqp1
								EBF2	Setd5
								EBF2	Dpep1
								EBF2	Cdca8
								EBF2	Cptp
								EBF2	Yju2
								EBF2	Kdm6b
								EBF2	Polr3a
								EBF2	Mau2
								EBF2	Coa5
								EBF2	Trak2
								EBF2	Faim2
								EBF2	Gm525
								EBF2	Wnt10a
								EBF2	Ube2d3
								EBF2	Pusl1
								EBF2	Bag5
								EBF2	Rfxank
								FoxD3	Donson
								FoxD3	1110065P20Rik
								FoxD3	Cog8
								FoxD3	Slc9a1
								FoxD3	Hic2
								FoxD3	Zdhhc4
								FoxD3	Eaf1
								FoxD3	Arglu1
								FoxD3	H2bc21
								FoxD3	Cnpy4
								FoxD3	Rps21
								FoxD3	Rab35
								FoxD3	Zbtb37
								FoxD3	Cptp
								FoxD3	Entr1
								FoxD3	Exoc3l
								FoxD3	Armc6
								FoxD3	Fbxw9
								FoxD3	Ranbp1
								FoxD3	Tnfsf13
								Gata1	Polr3c
								Gata1	Psma4
								Gata1	Frg2f1
								Gata1	Ccdc173
								Gata1	Trmt5
								Gata1	Cept1
								Gata1	Nup188
								Gata1	6030458C11Rik
								Gata1	Pole3
								Gata1	Adal
								Gata1	2810004N23Rik
								Gata1	Sult1a1
								Gata1	Gata1
								Gata1	Glyr1
								Gata1	Elovl3
								Gata1	Moap1
								Gata1	Ptcd1
								Gata1	Hoxc8
								Gata1	Nedd8
								Gata1	Eef1d
								Gata1	Iqcn
								Gata1	Cct6a
								Gata1	Ankrd49
								Gata1	Ccn6
								Gata1	Fkbp15
								Gata1	1110065P20Rik
								Gata1	Mipol1
								Gata1	Mrps26
								Gata1	Zmym5
								Gata1	Oser1
								Gata1	Eloc
								Gata1	Ctdspl2
								Gata1	1810024B03Rik
								Gata1	Gpalpp1
								Gata1	Mitd1
								Gata1	Fam104a
								Gata1	Cog8
								Gata1	Pus7l
								Gata1	Dph5
								Gata1	Phf7
								Gata1	Aimp2
								Gata1	Alg10b
								Gata1	Hic2
								Gata1	Mterf4
								Gata1	4930558K02Rik
								Gata1	Gm14137
								Gata1	Zfp882
								Gata1	Sys1
								Gata1	Hax1
								Gata1	Blzf1
								Gata1	Rpa3
								Gata1	Tmtc3
								Gata1	Parpbp
								Gata1	Rps27
								Gata1	Slc7a6os
								Gata1	Zc2hc1c
								Gata1	Cnbd2
								Gata1	Cdk9
								Gata1	Glt8d1
								Gata1	Kars
								Gata1	Mrpl54
								Gata1	Rbm7
								Gata1	Ecd
								Gata1	Ccdc115
								Gata1	Eaf1
								Gata1	Gin1
								Gata1	Chkb
								Gata1	Nkg7
								Gata1	H2bc21
								Gata1	Gjc2
								Gata1	Sbds
								Gata1	Atrip
								Gata1	Ep400
								Gata1	Cnpy4
								Gata1	Nudcd1
								Gata1	Lrrc57
								Gata1	Ckap2l
								Gata1	Brox
								Gata1	Pdzk1ip1
								Gata1	Hsp90b1
								Gata1	Ptcd3
								Gata1	Phf5a
								Gata1	Desi1
								Gata1	Pigx
								Gata1	Churc1
								Gata1	Rpl36al
								Gata1	Tnf
								Gata1	Rpap2
								Gata1	Ptges
								Gata1	Mrpl50
								Gata1	Tmem42
								Gata1	Wdr12
								Gata1	Gabarapl1
								Gata1	Erg28
								Gata1	Ttc16
								Gata1	Cbarp
								Gata1	Osgep
								Gata1	Styxl1
								Gata1	Slc11a1
								Gata1	Fhl4
								Gata1	Srr
								Gata1	Lim2
								Gata1	Wdfy2
								Gata1	Pradc1
								Gata1	St13
								Gata1	Gabpb2
								Gata1	Cks1b
								Gata1	Ppil6
								Gata1	Ddx59
								Gata1	Zfp142
								Gata1	Cd248
								Gata1	Mrpl40
								Gata1	Ndufs3
								Gata1	Entr1
								Gata1	Pigp
								Gata1	Exosc8
								Gata1	Elp4
								Gata1	Zfp740
								Gata1	Smco3
								Gata1	Sap30bp
								Gata1	Exoc3l
								Gata1	Ndor1
								Gata1	Armc6
								Gata1	Fbxw9
								Gata1	Ap3m1
								Gata1	Siae
								Gata1	Gorasp1
								Gata1	1110059G10Rik
								Gata1	Wars
								Gata1	Ppme1
								Gata1	Dnajb9
								Gata1	BC028528
								Gata1	Nat9
								Gata1	Romo1
								Gata1	Dus4l
								Gata1	Tatdn1
								Gata1	Cdc27
								Gata1	Mrto4
								Gata1	Dis3
								Gata1	Trip11
								Gata1	Prpf38a
								Gata1	Zfyve19
								Gata1	Ganc
								Gata1	Donson
								Gata1	Kxd1
								Gata1	Prorp
								Gata1	Slc25a29
								Gata1	Mfsd8
								Gata1	Pop1
								Gata1	Polr2h
								Gata1	Acss2
								Gata1	Pkd1l3
								Gata1	Klhl28
								Gata1	Aaas
								Gata1	Uba5
								Gata1	Mrpl14
								Gata1	Ergic3
								Gata1	Gpd1
								Gata1	Fam166b
								Gata1	Myd88
								Gata1	Eif3j1
								Gata1	Znhit1
								Gata1	Mfap1a
								Gata1	Ctse
								Gata1	Zcrb1
								Gata1	S1pr5
								Gata1	Nipa2
								Gata1	Tmem258
								Gata1	Cops5
								Gata1	Mastl
								Gata1	Fastkd5
								Gata1	Emilin1
								Gata1	Slc9a1
								Gata1	Oxnad1
								Gata1	Hacl1
								Gata1	Ormdl2
								Gata1	Gtf3c4
								Gata1	Sema3g
								Gata1	Arfrp1
								Gata1	Glb1l
								Gata1	Ccdc107
								Gata1	Pdzd3
								Gata1	Zfp654
								Gata1	Clcn6
								Gata1	Tsacc
								Gata1	Atpsckmt
								Gata1	2700097O09Rik
								Gata1	Odr4
								Gata1	Sh3bp5l
								Gata1	Samsn1
								Gata1	Atp6v1d
								Gata1	Tmem129
								Gata1	Zbtb26
								Gata1	Dynll1
								Gata1	Hsdl1
								Gata1	Sdhd
								Gata1	Xab2
								Gata1	Rnf139
								Gata1	Dcaf17
								Gata1	L3hypdh
								Gata1	Ncdn
								Gata1	Sec61b
								Gata1	Tatdn3
								Gata1	Bag4
								Gata1	Trmt112
								Gata1	Mpst
								Gata1	Hyls1
								Gata1	Dnajc2
								Gata1	Sap18
								Gata1	Dad1
								Gata1	Ranbp10
								Gata1	Rbak
								Gata1	Pign
								Gata1	Rps21
								Gata1	Sec16a
								Gata1	Bcl2l12
								Gata1	Gtf2e1
								Gata1	Htra2
								Gata1	D6Wsu163e
								Gata1	Zbtb49
								Gata1	Pbld2
								Gata1	Pip4p1
								Gata1	Naa50
								Gata1	Trmt6
								Gata1	Sdhc
								Gata1	Ankrd34a
								Gata1	Ftsj3
								Gata1	Nmrk2
								Gata1	Syngap1
								Gata1	Ptges3l
								Gata1	Rnf25
								Gata1	Ints13
								Gata1	1700029J07Rik
								Gata1	Emc3
								Gata1	Rbks
								Gata1	Pdxdc1
								Gata1	Nae1
								Gata1	Cdca8
								Gata1	Cptp
								Gata1	Trex1
								Gata1	Smc4
								Gata1	U2af1l4
								Gata1	Polr3a
								Gata1	Ctsk
								Gata1	Mau2
								Gata1	Troap
								Gata1	Coa5
								Gata1	Trak2
								Gata1	Ranbp1
								Gata1	Tnfsf13
								Gata1	Ikzf5
								Gata1	Ube2d3
								Gata1	Bag5
								Gata1	Usp5
								Gata1	Tceanc2
								Gata1	Cetn4
								Gata1	Fam227b
								Gata1	2510002D24Rik
								Gata1	Rfxank
								Gata2	Trim56
								Gata2	Il13
								Gata2	Arsa
								Gata2	Ctse
								Gata2	Gpr132
								Gata2	Emp3
								Gata2	Pus7l
								Gata2	Havcr2
								Gata2	Emilin1
								Gata2	Asb2
								Gata2	Sbds
								Gata2	Aqp9
								Gata2	Tatdn3
								Gata2	Pheta2
								Gata2	P2ry14
								Gata2	Mettl1
								Gata2	Tespa1
								Gata2	Pbld2
								Gata2	Rab35
								Gata2	Slc11a1
								Gata2	1700029J07Rik
								Gata2	Olfr98
								Gata2	Trex1
								Gata2	Entr1
								Gata3	Polr3c
								Gata3	Pole3
								Gata3	Gata1
								Gata3	Moap1
								Gata3	Olfr9
								Gata3	Cxcl13
								Gata3	Casp12
								Gata3	Wdr3
								Gata3	Acox2
								Gata3	Tnfrsf26
								Gata3	Sectm1a
								Gata3	Ccn6
								Gata3	Plagl2
								Gata3	Arsa
								Gata3	Dll4
								Gata3	Ctdspl2
								Gata3	Ctla2b
								Gata3	Fam104a
								Gata3	Qprt
								Gata3	Pus7l
								Gata3	Has1
								Gata3	Tigit
								Gata3	Asic4
								Gata3	Lrrc4b
								Gata3	Hic2
								Gata3	Mterf4
								Gata3	Gm14137
								Gata3	Gpr65
								Gata3	Fam71b
								Gata3	Gpr119
								Gata3	Rps27
								Gata3	Plin4
								Gata3	Krt80
								Gata3	Ovol1
								Gata3	Frmd7
								Gata3	Cnbd2
								Gata3	Tmigd3
								Gata3	Spns3
								Gata3	Ccdc115
								Gata3	Il27
								Gata3	Lcp2
								Gata3	Gin1
								Gata3	Ly6g5c
								Gata3	Nkg7
								Gata3	H2bc21
								Gata3	Chrm5
								Gata3	Rgs13
								Gata3	Il2rb
								Gata3	Mmab
								Gata3	Mip
								Gata3	Sla
								Gata3	Brox
								Gata3	Cdc42se1
								Gata3	Ptcd3
								Gata3	Pigx
								Gata3	Churc1
								Gata3	Rpl36al
								Gata3	Tnf
								Gata3	Osm
								Gata3	Tespa1
								Gata3	Gabarapl1
								Gata3	Ttc16
								Gata3	Osgep
								Gata3	Slc11a1
								Gata3	Wdfy2
								Gata3	Gabpb2
								Gata3	Cdh17
								Gata3	Baalc
								Gata3	Ndufs3
								Gata3	Gbp8
								Gata3	Kremen2
								Gata3	Hcls1
								Gata3	Akap6
								Gata3	Ptpn7
								Gata3	Armc6
								Gata3	Tmem71
								Gata3	Ccdc80
								Gata3	Cbln3
								Gata3	Milr1
								Gata3	Wars
								Gata3	Ppme1
								Gata3	Romo1
								Gata3	Tatdn1
								Gata3	Supt7l
								Gata3	Cdc27
								Gata3	Prpf38a
								Gata3	Rgs1
								Gata3	Flrt1
								Gata3	Kxd1
								Gata3	Il13
								Gata3	Acss2
								Gata3	Pkd1l3
								Gata3	Lct
								Gata3	Cytip
								Gata3	Mrpl14
								Gata3	Fam166b
								Gata3	Bfsp2
								Gata3	Itgax
								Gata3	Jrkl
								Gata3	Gpr132
								Gata3	Wfdc1
								Gata3	Tnfsf14
								Gata3	Mettl7b
								Gata3	Fastkd5
								Gata3	Olfr432
								Gata3	Tgtp2
								Gata3	Havcr2
								Gata3	Emilin1
								Gata3	Sectm1b
								Gata3	Skap1
								Gata3	Asb2
								Gata3	Cnga1
								Gata3	Spata17
								Gata3	Hsd11b1
								Gata3	Ly6a
								Gata3	Rhbdl1
								Gata3	Tsacc
								Gata3	Ide
								Gata3	Gimap6
								Gata3	2700097O09Rik
								Gata3	Samsn1
								Gata3	Cma1
								Gata3	Atp6v1d
								Gata3	Tmem151b
								Gata3	Podnl1
								Gata3	Ly6c1
								Gata3	Aqp9
								Gata3	Sdhd
								Gata3	Scd4
								Gata3	Klrd1
								Gata3	Xab2
								Gata3	Olfr433
								Gata3	Rnf139
								Gata3	Ncdn
								Gata3	Ffar2
								Gata3	Synpr
								Gata3	Sec61b
								Gata3	Il7r
								Gata3	Rab7b
								Gata3	Olfr1258
								Gata3	Pheta2
								Gata3	Scnm1
								Gata3	P2ry14
								Gata3	Ifitm5
								Gata3	Rps21
								Gata3	Casq1
								Gata3	Acsbg1
								Gata3	Htra2
								Gata3	Ccrl2
								Gata3	Adh6b
								Gata3	Pbld2
								Gata3	Pip4p1
								Gata3	Naa50
								Gata3	Enkur
								Gata3	Ctla2a
								Gata3	Ptges3l
								Gata3	Map2k3
								Gata3	Rbks
								Gata3	Lgals9
								Gata3	Zfp408
								Gata3	Rag1
								Gata3	Setd5
								Gata3	Kdm6b
								Gata3	Trex1
								Gata3	Cd53
								Gata3	Coa5
								Gata3	Igtp
								Gata3	Fastkd3
								Gata3	Ranbp1
								Gata3	Usp5
								Gata3	Cetn4
								Gata4	Frg2f1
								Gata4	Nedd8
								Gata4	Ripk2
								Gata4	S1pr5
								Gata4	Nipa2
								Gata4	Mastl
								Gata4	Oxnad1
								Gata4	Ccdc59
								Gata4	A530032D15Rik
								Gata4	Zfp654
								Gata4	Atrip
								Gata4	L3hypdh
								Gata4	Tmem42
								Gata4	Gm3264
								Gata4	Erg28
								Gata4	Osgep
								Gata4	Pip4p1
								Gata4	Pradc1
								Gata4	Ints13
								Gata4	Mrpl40
								Gata4	Ndufs3
								Gata4	Pigp
								Gata4	Ap3m1
								Gata4	Gm525
								Gata4	Romo1
								Gata4	2510002D24Rik
								Gata4	Dus4l
								Gata6	2410124H12Rik
								Gata6	Map3k19
								Gata6	Akr1b8
								Gata6	Acsbg1
								Gata6	Agmat
								Gata6	Pradc1
								Gata6	Vcam1
								Gata6	Kdm6b
								Gata6	Clcn6
								TCF12	Psma4
								TCF12	Dio1
								TCF12	Nup188
								TCF12	Gata1
								TCF12	Plp1
								TCF12	Ankrd49
								TCF12	Fcgr4
								TCF12	Bglap2
								TCF12	1110065P20Rik
								TCF12	Serpina3n
								TCF12	Mipol1
								TCF12	Akr1b8
								TCF12	Oser1
								TCF12	Cdca2
								TCF12	Ctdspl2
								TCF12	Itih3
								TCF12	Agxt
								TCF12	Fam104a
								TCF12	Cog8
								TCF12	Pus7l
								TCF12	Lrrc4b
								TCF12	Pdcd10
								TCF12	Gm14137
								TCF12	Tex33
								TCF12	Hax1
								TCF12	Plin4
								TCF12	Gm4925
								TCF12	Hsd17b3
								TCF12	Glt8d1
								TCF12	Kars
								TCF12	Spns3
								TCF12	Odf3
								TCF12	Wfdc6a
								TCF12	Has2
								TCF12	H2bc21
								TCF12	Jph2
								TCF12	Sbds
								TCF12	Lyve1
								TCF12	Atrip
								TCF12	Gsta3
								TCF12	Gpr179
								TCF12	Col4a2
								TCF12	Hsp90b1
								TCF12	Phf5a
								TCF12	Mettl1
								TCF12	Ahsg
								TCF12	Ptges
								TCF12	Iqca1l
								TCF12	C7
								TCF12	Erg28
								TCF12	Tex37
								TCF12	Ttc16
								TCF12	Rab35
								TCF12	Lect2
								TCF12	Cbarp
								TCF12	Otof
								TCF12	Methig1
								TCF12	Dnah12
								TCF12	Ppil6
								TCF12	Recql4
								TCF12	Ddx59
								TCF12	Cd248
								TCF12	Brix1
								TCF12	Cyb561d2
								TCF12	Gys2
								TCF12	Ndufs3
								TCF12	Cpa4
								TCF12	Exosc8
								TCF12	Akap6
								TCF12	Vwa7
								TCF12	Calhm1
								TCF12	Exoc3l
								TCF12	Armc6
								TCF12	Zfp648
								TCF12	Mgp
								TCF12	Cbln3
								TCF12	Nlrp10
								TCF12	Milr1
								TCF12	Wars
								TCF12	Ppme1
								TCF12	Efcab9
								TCF12	Nat9
								TCF12	Fam83a
								TCF12	Supt7l
								TCF12	Cdc27
								TCF12	Krt23
								TCF12	Zfyve19
								TCF12	Prorp
								TCF12	Slc25a29
								TCF12	Pop1
								TCF12	Polr2h
								TCF12	Aaas
								TCF12	Uba5
								TCF12	Lct
								TCF12	Myd88
								TCF12	Gpc2
								TCF12	Znhit1
								TCF12	Lmntd1
								TCF12	Ctse
								TCF12	Zcrb1
								TCF12	Gpr132
								TCF12	Nipa2
								TCF12	Tcte2
								TCF12	Cops5
								TCF12	Gpihbp1
								TCF12	Upk1b
								TCF12	Cox4i2
								TCF12	Slc9a5
								TCF12	Slc25a32
								TCF12	Krtap9-3
								TCF12	Gbgt1
								TCF12	Cnfn
								TCF12	Tmem176b
								TCF12	Ormdl2
								TCF12	Rnf183
								TCF12	Asb2
								TCF12	Arfrp1
								TCF12	Tspan8
								TCF12	Ssc5d
								TCF12	Dntt
								TCF12	Eno3
								TCF12	Odaph
								TCF12	Cnga1
								TCF12	Ccdc59
								TCF12	Glb1l
								TCF12	Rsph14
								TCF12	Tsacc
								TCF12	Olfr148
								TCF12	Hcar1
								TCF12	Hoxa1
								TCF12	Zdhhc3
								TCF12	Eps8l3
								TCF12	Sult3a2
								TCF12	Orm3
								TCF12	Sh3bp5l
								TCF12	Hsdl1
								TCF12	Mfap2
								TCF12	Aqp9
								TCF12	Mymk
								TCF12	Fezf2
								TCF12	Gpr15
								TCF12	Ncdn
								TCF12	Synpr
								TCF12	Rasgrp4
								TCF12	Tatdn3
								TCF12	Fam114a1
								TCF12	Gm3646
								TCF12	Bag4
								TCF12	Scnm1
								TCF12	Zwilch
								TCF12	Ifitm5
								TCF12	Xkr9
								TCF12	Iqch
								TCF12	Grin2c
								TCF12	Ranbp10
								TCF12	Selenon
								TCF12	Wfdc8
								TCF12	Acsbg1
								TCF12	Ccrl2
								TCF12	D6Wsu163e
								TCF12	Frmpd3
								TCF12	Trmt6
								TCF12	Tmem247
								TCF12	Itfg1
								TCF12	Tex52
								TCF12	Ftsj3
								TCF12	Ptges3l
								TCF12	Rnf25
								TCF12	Map2k3
								TCF12	1700029J07Rik
								TCF12	Rbks
								TCF12	Fmod
								TCF12	Fam234b
								TCF12	Kif28
								TCF12	Baiap2l1
								TCF12	Smc4
								TCF12	Fkbp10
								TCF12	Best3
								TCF12	Troap
								TCF12	Scrg1
								TCF12	Casq2
								TCF12	Sptbn5
								TCF12	Tceanc2
								TCF12	Cetn4
								TCF12	Fam227b
								TCF12	Frg2f1
								TCF12	Clec2h
								TCF12	Adal
								TCF12	Ermap
								TCF12	Olfr9
								TCF12	Moap1
								TCF12	Gm7102
								TCF12	Tnfrsf26
								TCF12	Iqcn
								TCF12	Cav3
								TCF12	Zmym5
								TCF12	Arsa
								TCF12	Poglut2
								TCF12	1810024B03Rik
								TCF12	Dupd1
								TCF12	Gpalpp1
								TCF12	Npb
								TCF12	Sdsl
								TCF12	Mrpl13
								TCF12	Klhdc3
								TCF12	Qprt
								TCF12	Sdr9c7
								TCF12	Has1
								TCF12	Popdc3
								TCF12	Myl3
								TCF12	Glul
								TCF12	Gm12500
								TCF12	Higd1b
								TCF12	Zfp882
								TCF12	Allc
								TCF12	Tmem255a
								TCF12	Rpa3
								TCF12	Fam71b
								TCF12	Parpbp
								TCF12	Rps27
								TCF12	Misp
								TCF12	Ovol1
								TCF12	Mroh2a
								TCF12	Cnbd2
								TCF12	Gjb1
								TCF12	Tmigd3
								TCF12	Cdk9
								TCF12	Crip3
								TCF12	Ccdc115
								TCF12	Itga11
								TCF12	Gm7616
								TCF12	Lcp2
								TCF12	Arglu1
								TCF12	Clic1
								TCF12	Il2rb
								TCF12	Gper1
								TCF12	Nr0b2
								TCF12	Mmab
								TCF12	Rbp7
								TCF12	Nudcd1
								TCF12	Mip
								TCF12	Lrrc57
								TCF12	Tcf23
								TCF12	Ckap2l
								TCF12	Cdc42se1
								TCF12	Ambp
								TCF12	Irgm2
								TCF12	Ptcd3
								TCF12	Kcng4
								TCF12	Defb19
								TCF12	Wdr95
								TCF12	Rnf144a
								TCF12	Apol6
								TCF12	Lmx1b
								TCF12	Hccs
								TCF12	Arhgef6
								TCF12	Churc1
								TCF12	Entpd8
								TCF12	Tmem79
								TCF12	Tnf
								TCF12	Rpap2
								TCF12	4930432M17Rik
								TCF12	Mrpl50
								TCF12	Osm
								TCF12	Pcolce
								TCF12	Wdr12
								TCF12	Trim61
								TCF12	Gsta1
								TCF12	Psapl1
								TCF12	Flnc
								TCF12	Nde1
								TCF12	Osgep
								TCF12	Styxl1
								TCF12	Pradc1
								TCF12	Cks1b
								TCF12	Rnase9
								TCF12	Mab21l4
								TCF12	Panx3
								TCF12	Zfp931
								TCF12	Elp4
								TCF12	Smco3
								TCF12	Fga
								TCF12	Ndor1
								TCF12	Ccn2
								TCF12	Aox2
								TCF12	Dnajb9
								TCF12	Hoxc12
								TCF12	Meox1
								TCF12	Romo1
								TCF12	Bhlha15
								TCF12	Mrto4
								TCF12	Donson
								TCF12	Kxd1
								TCF12	Tfap2b
								TCF12	Acss2
								TCF12	Rtn4rl2
								TCF12	Klhl28
								TCF12	Gpd1
								TCF12	Btg4
								TCF12	Fam166b
								TCF12	Ripk2
								TCF12	Eif3j1
								TCF12	Naa11
								TCF12	S1pr5
								TCF12	Wfdc1
								TCF12	Tmem258
								TCF12	Odf3l1
								TCF12	Mastl
								TCF12	Phf11d
								TCF12	Cldn2
								TCF12	Lce1d
								TCF12	Gtf3c4
								TCF12	Sema3g
								TCF12	Skap1
								TCF12	Cacng8
								TCF12	Cmc1
								TCF12	Prss46
								TCF12	Zdhhc4
								TCF12	Gpr183
								TCF12	Tnnt2
								TCF12	Gnrh1
								TCF12	Hsd11b1
								TCF12	Spata17
								TCF12	Cd300a
								TCF12	Svopl
								TCF12	Prnp
								TCF12	Zfp654
								TCF12	Eef1akmt1
								TCF12	Pla2g2e
								TCF12	Clcn6
								TCF12	Ranbp3l
								TCF12	Gucd1
								TCF12	Senp8
								TCF12	Ide
								TCF12	2700097O09Rik
								TCF12	Inpp5j
								TCF12	Epb42
								TCF12	Atp6v1d
								TCF12	Zbtb26
								TCF12	Dynll1
								TCF12	Hook1
								TCF12	Neu4
								TCF12	Scd4
								TCF12	Xab2
								TCF12	Cdrt4
								TCF12	L3hypdh
								TCF12	Grxcr2
								TCF12	Sec61b
								TCF12	C1qc
								TCF12	Fam217b
								TCF12	Trmt112
								TCF12	Mttp
								TCF12	P2ry14
								TCF12	Dnajc2
								TCF12	Sap18
								TCF12	Emg1
								TCF12	Pign
								TCF12	Rps21
								TCF12	Aoc3
								TCF12	Gtf2e1
								TCF12	Casq1
								TCF12	Usp50
								TCF12	Htra2
								TCF12	Bco1
								TCF12	Pip4p1
								TCF12	Krt24
								TCF12	Trappc11
								TCF12	Enkur
								TCF12	Ankrd34a
								TCF12	Nmrk2
								TCF12	Myh7
								TCF12	Cdsn
								TCF12	Igfn1
								TCF12	Wdr86
								TCF12	Clrn1
								TCF12	Olfr98
								TCF12	Tbx5
								TCF12	Setd5
								TCF12	Dpep1
								TCF12	Lrrc72
								TCF12	Yju2
								TCF12	Kdm6b
								TCF12	Trex1
								TCF12	Mybpc2
								TCF12	Tnfsf12
								TCF12	Ankrd1
								TCF12	Rtl9
								TCF12	Abhd12b
								TCF12	Mau2
								TCF12	Inmt
								TCF12	Mylk4
								TCF12	Igtp
								TCF12	Fastkd3
								TCF12	Myl2
								TCF12	Faim2
								TCF12	Clec12b
								TCF12	Ube2d3
								TCF12	Arhgap45
								TCF12	C1qtnf9
								TCF12	Bag5
								TCF12	Irs3
								TCF12	Rfxank
								TCF12	Polr3c
								TCF12	Ccdc173
								TCF12	Trmt5
								TCF12	Atp13a4
								TCF12	Olfr544
								TCF12	Nkpd1
								TCF12	Grifin
								TCF12	Sult1a1
								TCF12	Spaca9
								TCF12	Sox21
								TCF12	Eef1d
								TCF12	Cst11
								TCF12	Ccn6
								TCF12	Plagl2
								TCF12	Ltf
								TCF12	Tmem212
								TCF12	Mrps26
								TCF12	Mybphl
								TCF12	A530016L24Rik
								TCF12	Eloc
								TCF12	Hspb7
								TCF12	Emp3
								TCF12	Akr1cl
								TCF12	Tspan31
								TCF12	Tpsg1
								TCF12	Fpgt
								TCF12	Rnase13
								TCF12	Dph5
								TCF12	Phf7
								TCF12	Mgat4c
								TCF12	Capn8
								TCF12	Il12a
								TCF12	Alg10b
								TCF12	Hic2
								TCF12	Mterf4
								TCF12	4930558K02Rik
								TCF12	Sys1
								TCF12	Jsrp1
								TCF12	Slc24a1
								TCF12	Rhox10
								TCF12	Nr1i2
								TCF12	Zc2hc1c
								TCF12	Cd80
								TCF12	Calml4
								TCF12	Slc14a1
								TCF12	Mrpl54
								TCF12	Ecd
								TCF12	Drp2
								TCF12	Eaf1
								TCF12	Gin1
								TCF12	Ly6g5c
								TCF12	Adgrd1
								TCF12	Abcg8
								TCF12	Lingo4
								TCF12	Etv3l
								TCF12	Nkg7
								TCF12	Gjc2
								TCF12	Chrm5
								TCF12	Ep400
								TCF12	Mcam
								TCF12	Cmbl
								TCF12	Pdzk1ip1
								TCF12	2410124H12Rik
								TCF12	Pigx
								TCF12	Il22ra1
								TCF12	Pcdhga1
								TCF12	Tmem42
								TCF12	Gabarapl1
								TCF12	Tmem68
								TCF12	Pram1
								TCF12	Igfbp1
								TCF12	Il21r
								TCF12	Hnf4a
								TCF12	Pax8
								TCF12	Srr
								TCF12	Wdfy2
								TCF12	Hpse2
								TCF12	Lrrc55
								TCF12	1700029H14Rik
								TCF12	Parvg
								TCF12	Cmtm2b
								TCF12	Zfp142
								TCF12	Baalc
								TCF12	Agap2
								TCF12	Hrct1
								TCF12	Kremen2
								TCF12	Ptpn7
								TCF12	Fbxw9
								TCF12	Ap3m1
								TCF12	Gorasp1
								TCF12	1110059G10Rik
								TCF12	Wnt1
								TCF12	Cd86
								TCF12	Osgin1
								TCF12	Clca3a2
								TCF12	Dus4l
								TCF12	Tatdn1
								TCF12	Trim56
								TCF12	Omg
								TCF12	Trip11
								TCF12	Ergic3
								TCF12	Mrpl37
								TCF12	Wfikkn2
								TCF12	Crygs
								TCF12	C1qtnf5
								TCF12	Tnfsf14
								TCF12	Il17c
								TCF12	Aqp7
								TCF12	Tnfrsf13c
								TCF12	Havcr2
								TCF12	Oxnad1
								TCF12	Hacl1
								TCF12	Diras1
								TCF12	Akna
								TCF12	Cldn15
								TCF12	Ncmap
								TCF12	Slc35f6
								TCF12	Noto
								TCF12	Cd55b
								TCF12	Mmp19
								TCF12	E030018B13Rik
								TCF12	Aldh3b1
								TCF12	Rxfp4
								TCF12	Ankrd23
								TCF12	Sstr3
								TCF12	S100a4
								TCF12	Sdcbp2
								TCF12	Sec14l4
								TCF12	Hoxc5
								TCF12	Atpsckmt
								TCF12	Tmem129
								TCF12	Wdr54
								TCF12	Tmem151b
								TCF12	Ecscr
								TCF12	Sdhd
								TCF12	Lrtm2
								TCF12	Lyzl4
								TCF12	Dcaf17
								TCF12	Sv2a
								TCF12	Mpst
								TCF12	Fabp7
								TCF12	Dad1
								TCF12	Shbg
								TCF12	Zfp92
								TCF12	Krtap28-13
								TCF12	Syngap1
								TCF12	Odf1
								TCF12	Emc3
								TCF12	Lgals9
								TCF12	Trpv3
								TCF12	Nae1
								TCF12	U2af1l4
								TCF12	Insrr
								TCF12	Enoph1
								TCF12	Ranbp1
								TCF12	Ikzf5
								TCF12	Plekhg6
								TCF12	Tlr12
								TCF12	Mkln1
								TCF12	Usp5
[truncated: 5,329 more rows]
